# Supplementary material for: Nanowire enhanced dimensional accuracy in acrylate resin-based 3D printing
Source: Royal Society of Chemistry journal article supplement (doi:10.1039/c7nj02145c), 2017-01-01
Supplement: c7nj02145c1.pdf [file c7nj02145c1.pdf]

## Nanowires Enhanced Dimensional Accuracy in Acrylate Resin-Based 3D Printing

Yanyang Han,<sup>a</sup> Chee Chuan J. Yeo,<sup>b</sup> Dairong Chen,<sup>a</sup> Fei Wang,<sup>b</sup> Yiting Chong,<sup>b</sup> Xu Li,<sup>b</sup>  
Xiuling Jiao<sup>a,\*</sup> and FuKe Wang<sup>b,\*</sup>

<sup>a</sup> School of Chemistry & Chemical Engineering, Shandong University, Jinan 250100, P. R. China.

<sup>b</sup> Polymeric Materials Department, Institute of Materials Research and Engineering, Agency for Science, Technology and Research (A\*STAR), 2 Fusionopolis Way, #08-03 Innovis, Singapore 138634.

E-mail: [jiaoxl@sdu.edu.cn](mailto:jiaoxl@sdu.edu.cn); [wangf@imre.a-star.edu.sg](mailto:wangf@imre.a-star.edu.sg)

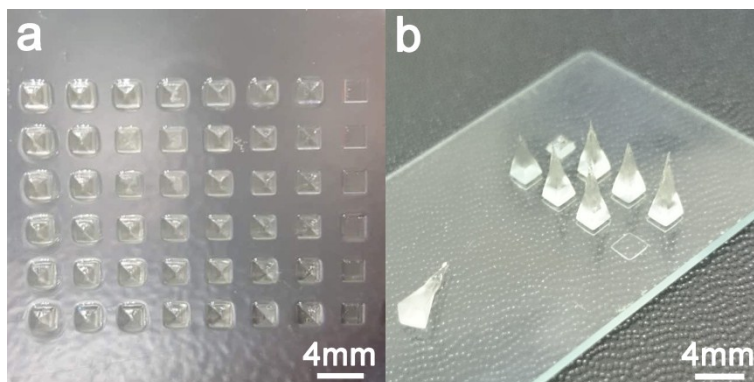

**Fig. S1 a)**, cubes array of 2mm × 2mm printed by ASIGA PICO 2 3D printer with HDDA resins, from which flat tops at initial stage and pyramid tops with longer exposure time were observed. **b)**, cone structures of neat HDDA formed after longer light exposure time.

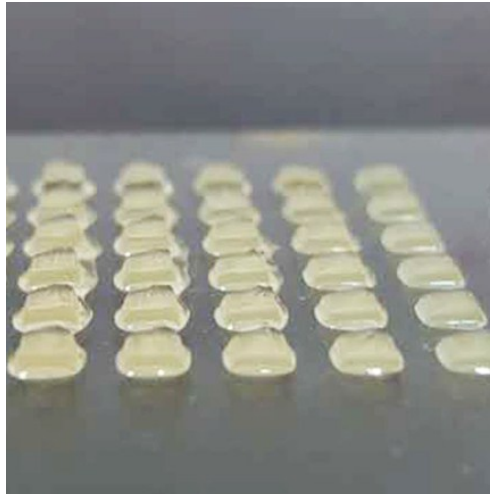

**Fig. S2** Cubes array of 2mm × 2mm printed by ASIGA PICO 2 3D printer with  $\gamma$ - $\text{Al}_2\text{O}_3$  incorporated HDDA resins.

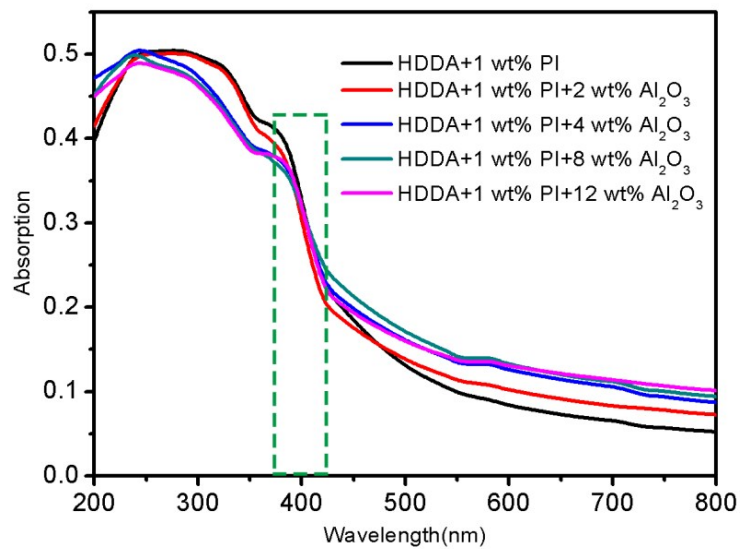

**Fig. S3** UV-vis spectra of HDDA resins without and with different amount of  $\gamma$ - $\text{Al}_2\text{O}_3$  nanowires: 2 wt%, 4 wt%, 8 wt% and 12 wt%.

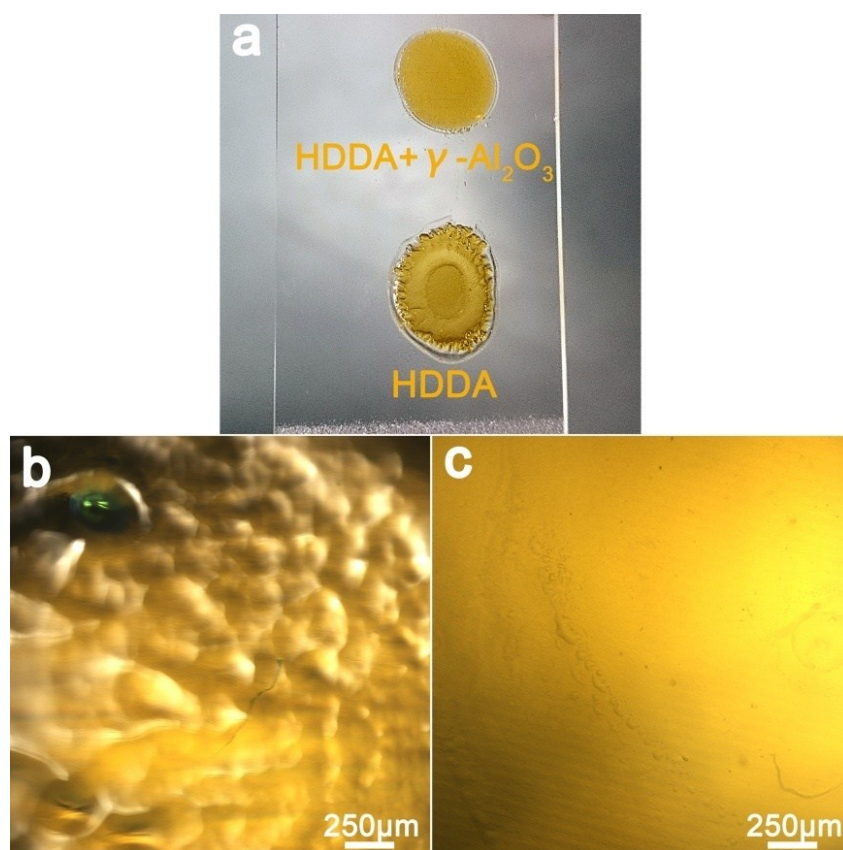

**Fig. S4** Shrinkage comparison of resins with and without  $\gamma$ -Al<sub>2</sub>O<sub>3</sub> nanowires: **a)** Smooth and even surface of cured HDDA resin with  $\gamma$ -Al<sub>2</sub>O<sub>3</sub> nanowires, while serious shrinkage of HDDA without  $\gamma$ -Al<sub>2</sub>O<sub>3</sub> nanowires was observed. Images of optical microscope (**b, c**, HDDA resins without and with  $\gamma$ -Al<sub>2</sub>O<sub>3</sub> nanowires) revealed further insight of this phenomenon.
